# Supplementary material for: Structural basis for the unique ganglioside and cell membrane recognition mechanism of botulinum neurotoxin DC
Source: PubMed Central journal article supplement (PMC5696347; doi:10.1038/s41467-017-01534-z), 2017-11-21
Supplement: 41467_2017_1534_MOESM1_ESM.pdf [file 41467_2017_1534_MOESM1_ESM.pdf]

7  
8  
9  
10  
11  
12  
13  
14  
15  
16  
17  
18  
19  
20  
21  
22  
23  
24  
25  
26  
27  
28  
29  
30  
31  
32  
33

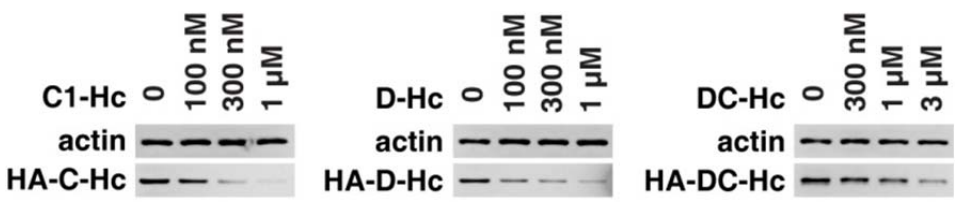

**Supplementary Figure 1. Binding sites for BoNT/DC, BoNT/D, and BoNT/C1 on cultured cortical neurons are specific and saturable.**

Cultured cortical neurons were exposed to HA-tagged BoNT/C1-H<sub>C</sub> (left panel), BoNT/D-H<sub>C</sub> (middle panel), or BoNT/DC-H<sub>C</sub> (right panel) in the presence of the indicated concentrations of non-tagged H<sub>C</sub> proteins, under the same assay conditions described in Fig. 1b-d, except that cell lysates were harvested and subjected to immunoblot analysis. Bound and internalized HA-tagged H<sub>C</sub> proteins were detected using an anti-HA antibody. Non-tagged H<sub>C</sub> competed with HA-tagged H<sub>C</sub> and reduced binding/internalization of HA-tagged H<sub>C</sub> proteins, demonstrating that the binding sites for all three toxins are specific and saturable on cultured cortical neurons.

One of two independent experiments is shown.

34

35

36

37

38

39

40

41

42

43

44

45

46

47

48

49

50

51

52

53

54

55 **Supplementary Figure 2. Stereo view of Sialyl-T, with its electron density map.**

56 (2F<sub>O</sub>-F<sub>C</sub> map contoured at 2.0σ) in blue.

57

58

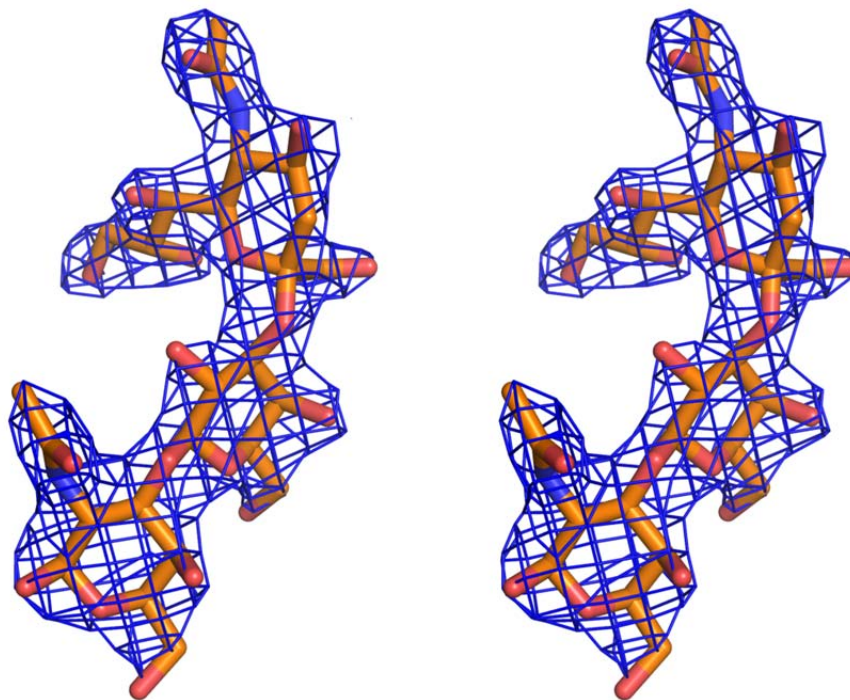

59  
60  
61  
62  
63  
64  
65  
66  
67  
68  
69  
70  
71  
72  
73  
74  
75  
76  
77  
78  
79  
80  
81  
82  
83

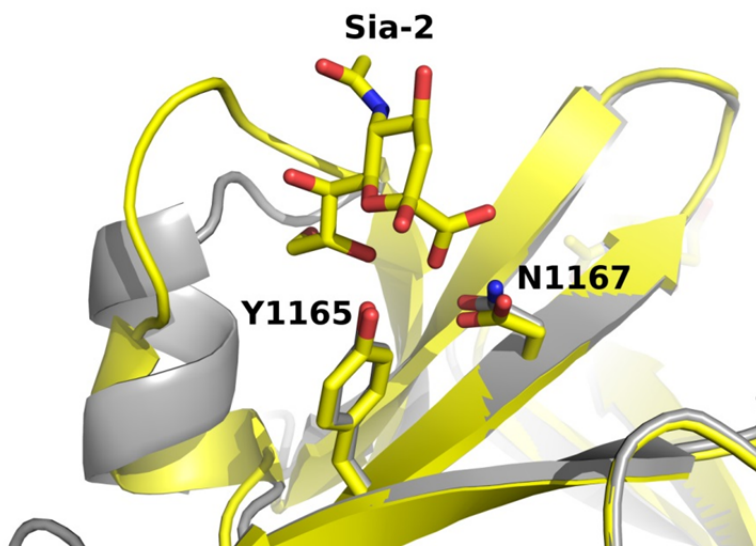

**Supplementary Figure 3. The homologous Sia-2 site in BoNT/C1 and BoNT/DC-H<sub>C</sub>**

Structural superimposition of BoNT/DC (grey) and BoNT/C1 (yellow), highlighting the Sia-2 site with the conserved Y1165/N1167 residues shown as sticks.

84  
85  
86  
87  
88  
89

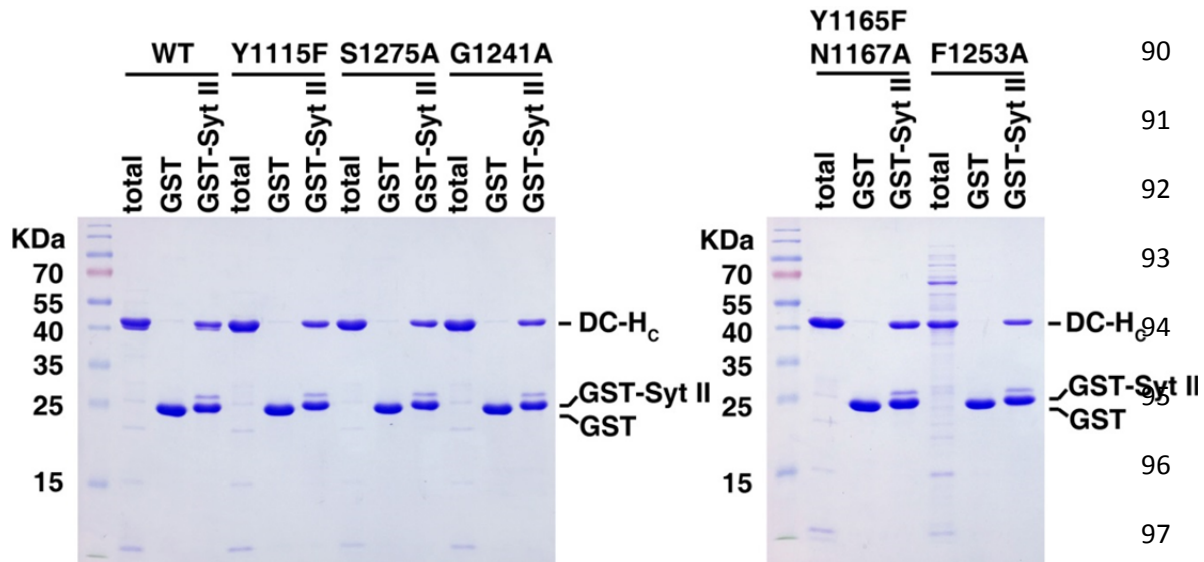

98  
99  
100  
101

102 **Supplementary Figure 4. Binding of selected BoNT/DC-H<sub>C</sub> mutants to recombinant Syt II**  
103 **in pull-down assays.**

104 GST and GST-fused Syt II (40-63) were immobilized on beads (20 μg proteins on 30 μl beads)  
105 and incubated with WT or indicated mutants (20 μg) in 200 μl solution. Pellets were analyzed by  
106 Coomassie Blue staining. Pull-down of BoNT/DC-H<sub>C</sub> mutants and WT BoNT/DC-H<sub>C</sub> by Syt II  
107 were at similar levels, indicating that these mutants still bind to Syt II and thus are likely folded  
108 correctly.

109 One of two independent experiments is shown.

110

111  
 112  
 113  
 114  
 115  
 116  
 117  
 118  
 119  
 120  
 121  
 122  
 123  
 124  
 125  
 126  
 127  
 128  
 129  
 130  
 131  
 132  
 133  
 134  
 135  
 136  
 137  
 138

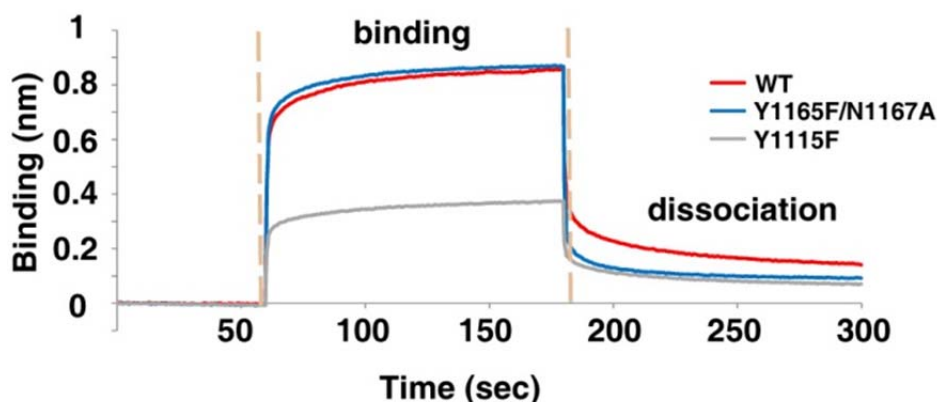

| DC-Hc         | $k_a$ (1/Ms)       | $k_a$ Error        | $k_d$ (1/s)           | $k_d$ Error           | $K_D$ (M)             |
|---------------|--------------------|--------------------|-----------------------|-----------------------|-----------------------|
| WT            | $1.32 \times 10^4$ | $2.16 \times 10^3$ | $3.6 \times 10^{-1}$  | $1.27 \times 10^{-2}$ | $2.76 \times 10^{-5}$ |
| Y1165F/N1167A | $2.18 \times 10^4$ | $5.42 \times 10^3$ | $7.75 \times 10^{-1}$ | $3.15 \times 10^{-2}$ | $3.5 \times 10^{-5}$  |
| Y1115F        | n.d                | n.d                | n.d                   | n.d                   | n.d                   |

**Supplementary Figure 5. Characterizing BoNT/DC-H<sub>C</sub> binding to biotinylated GM1 with the biolayer interferometry assay.**

Biotinylated GM1 was immobilized onto streptavidin-conjugated sensors and subjected to biolayer interferometry assay with the Blitz system (ForteBio). The sensors were exposed to three concentrations (5, 9, and 12  $\mu$ M) of WT, Y1165F/N1167A, and Y1115F BoNT/DC-H<sub>C</sub>, followed by washing in PBS. Representative binding and dissociation curves are presented for 12  $\mu$ M BoNT/DC-H<sub>C</sub>. The binding parameters were calculated using the Blitz system software (ForteBio). WT and Y1165F/N1167A bind to GM1 with similar dissociation constants ( $K_D$ ), while Y1115F did not show detectable binding to GM1 under our assay conditions.

139  
 140  
 141  
 142  
 143  
 144  
 145  
 146  
 147  
 148  
 149  
 150  
 151  
 152  
 153  
 154  
 155  
 156  
 157  
 158  
 159  
 160  
 161  
 162  
 163  
 164  
 165

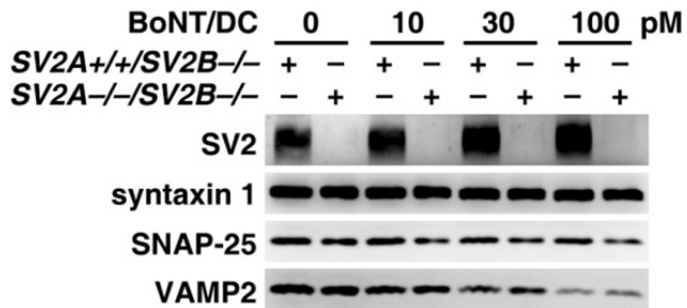

**Supplementary Figure 6. Lacking SV2 did not reduce the sensitivity of neurons to BoNT/DC.**

Primary cortical neurons express mainly SV2A and SV2B. Thus, cortical neurons cultured from SV2 A/B double-KO mice serve as a SV2-null model. Entry of BoNT/DC into SV2 A/B double-KO neurons were compared to neurons that still express SV2A (*SV2A*<sup>+/+</sup>/*SV2B*<sup>-/-</sup>) under the same assay conditions described in Fig. 1g. Cleavage of VAMP2 was at similar levels in SV2 A/B double-KO neurons and in neurons that express SV2A, suggesting that lack of SV2 did not reduce binding and entry of BoNT/DC.

One of two independent experiments is shown.

Figure 1

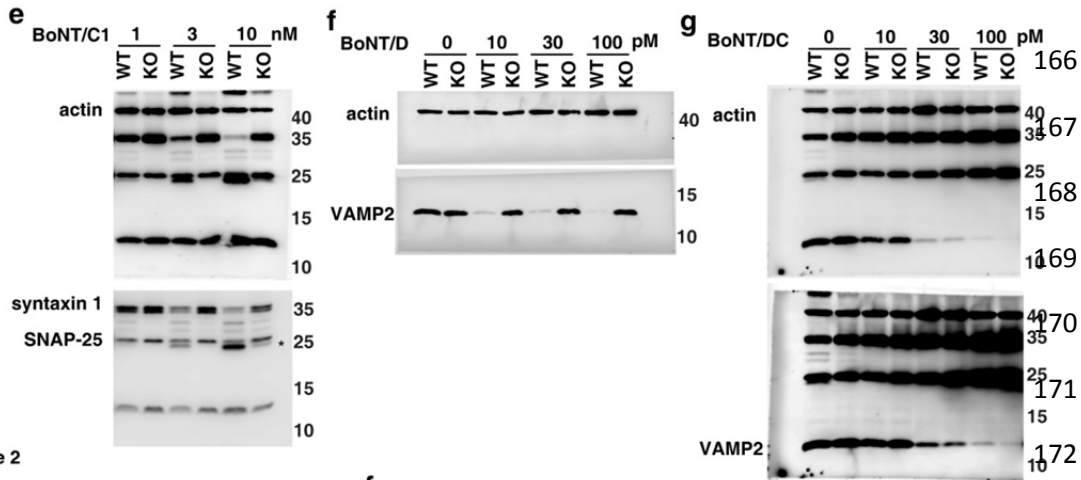

Figure 2

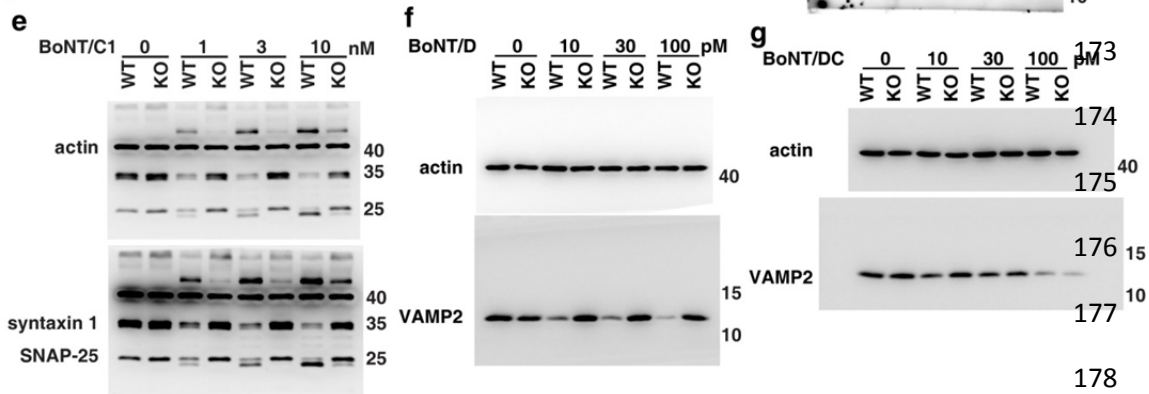

Figure 3

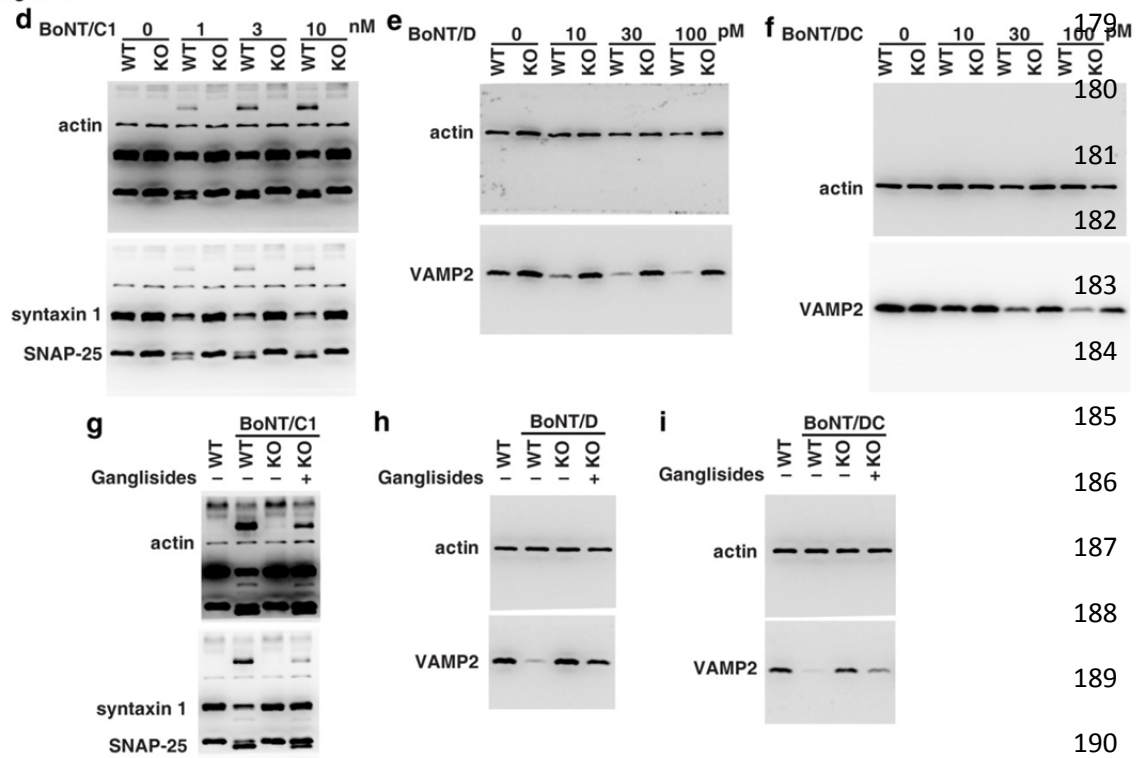

Figure 5

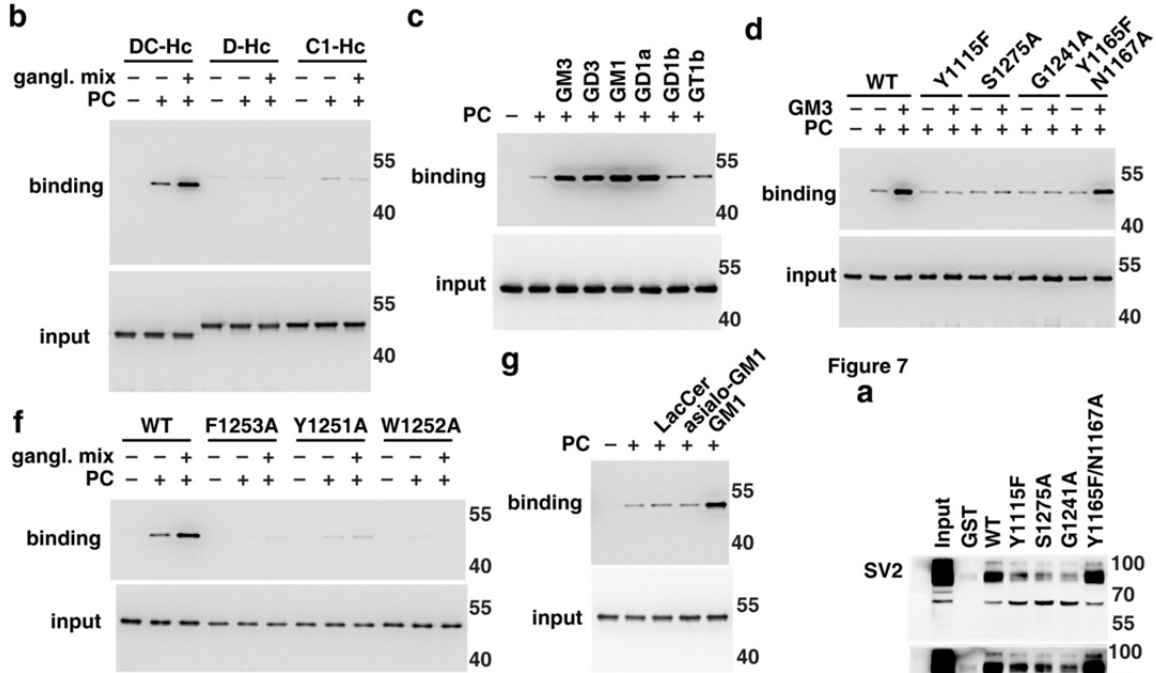

Figure 7

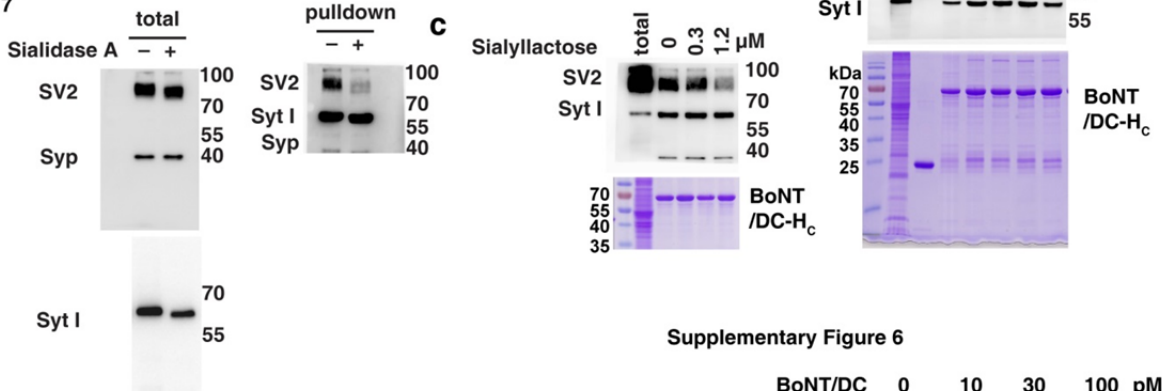

Supplementary Figure 1

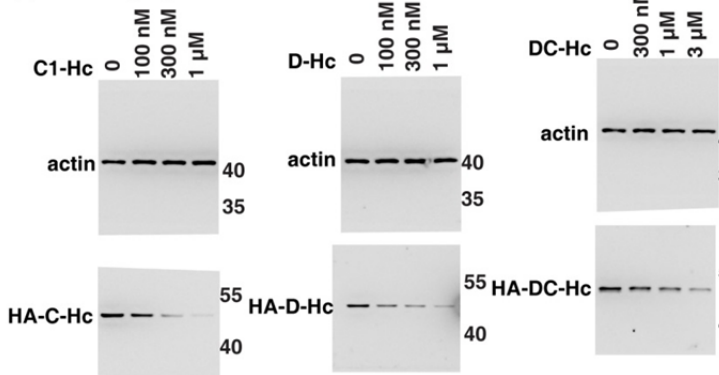

Supplementary Figure 6

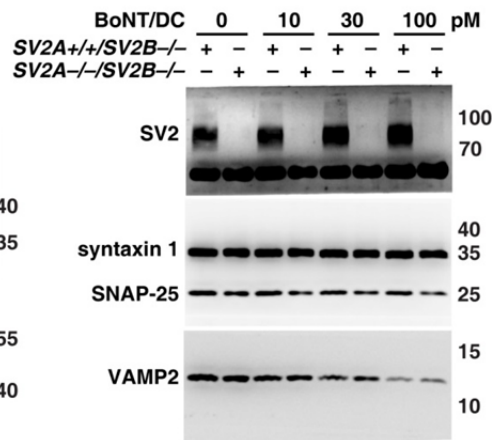

192

193

194 Supplementary Data (Full blot images)
